# Supplementary material for: Pelage variation and morphometrics of closely related Callithrix marmoset species and their hybrids
Source: PubMed Central journal article supplement (PMC11414090; doi:10.1186/s12862-024-02305-3), 2024-09-20

Front half of vertex

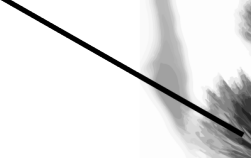

Orbital region

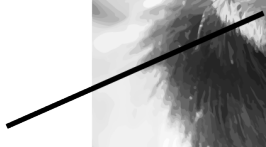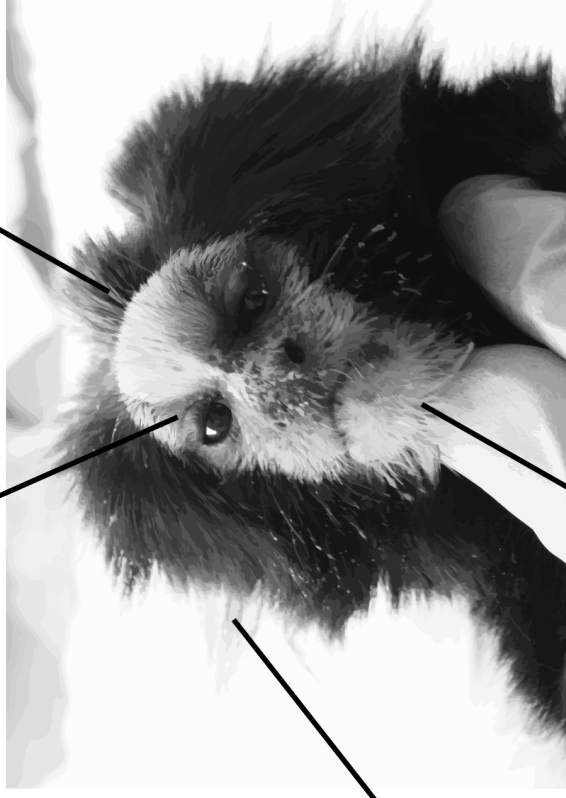

Menton region

Tuft

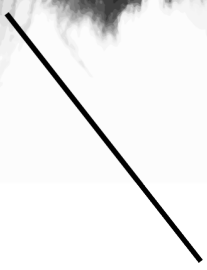

Tuft

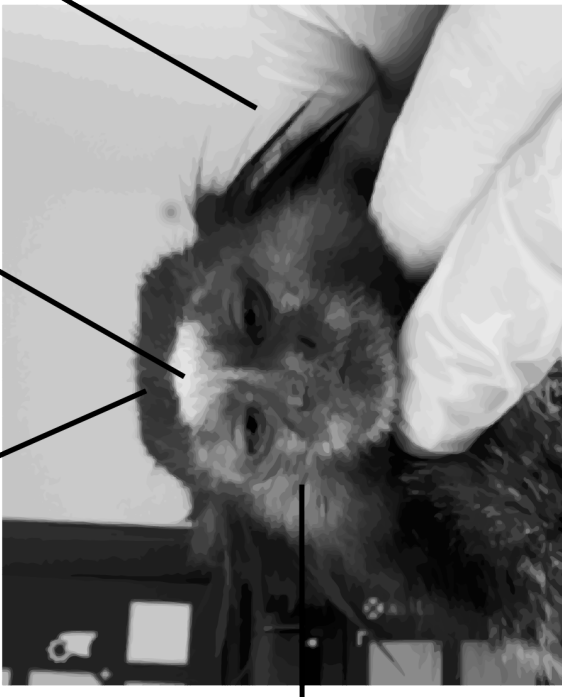

White mark

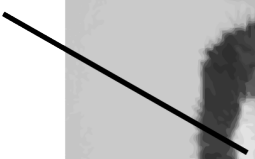

Back half of vertex

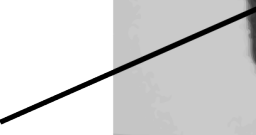

Lateral side

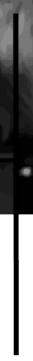

Supplement: 12862_2024_2305_MOESM1_ESM.pdf [file 12862_2024_2305_MOESM1_ESM.pdf]
