# Supplementary material for: Pelage variation and morphometrics of closely related Callithrix marmoset species and their hybrids
Source: PubMed Central journal article supplement (PMC11414090; doi:10.1186/s12862-024-02305-3), 2024-09-20

Body

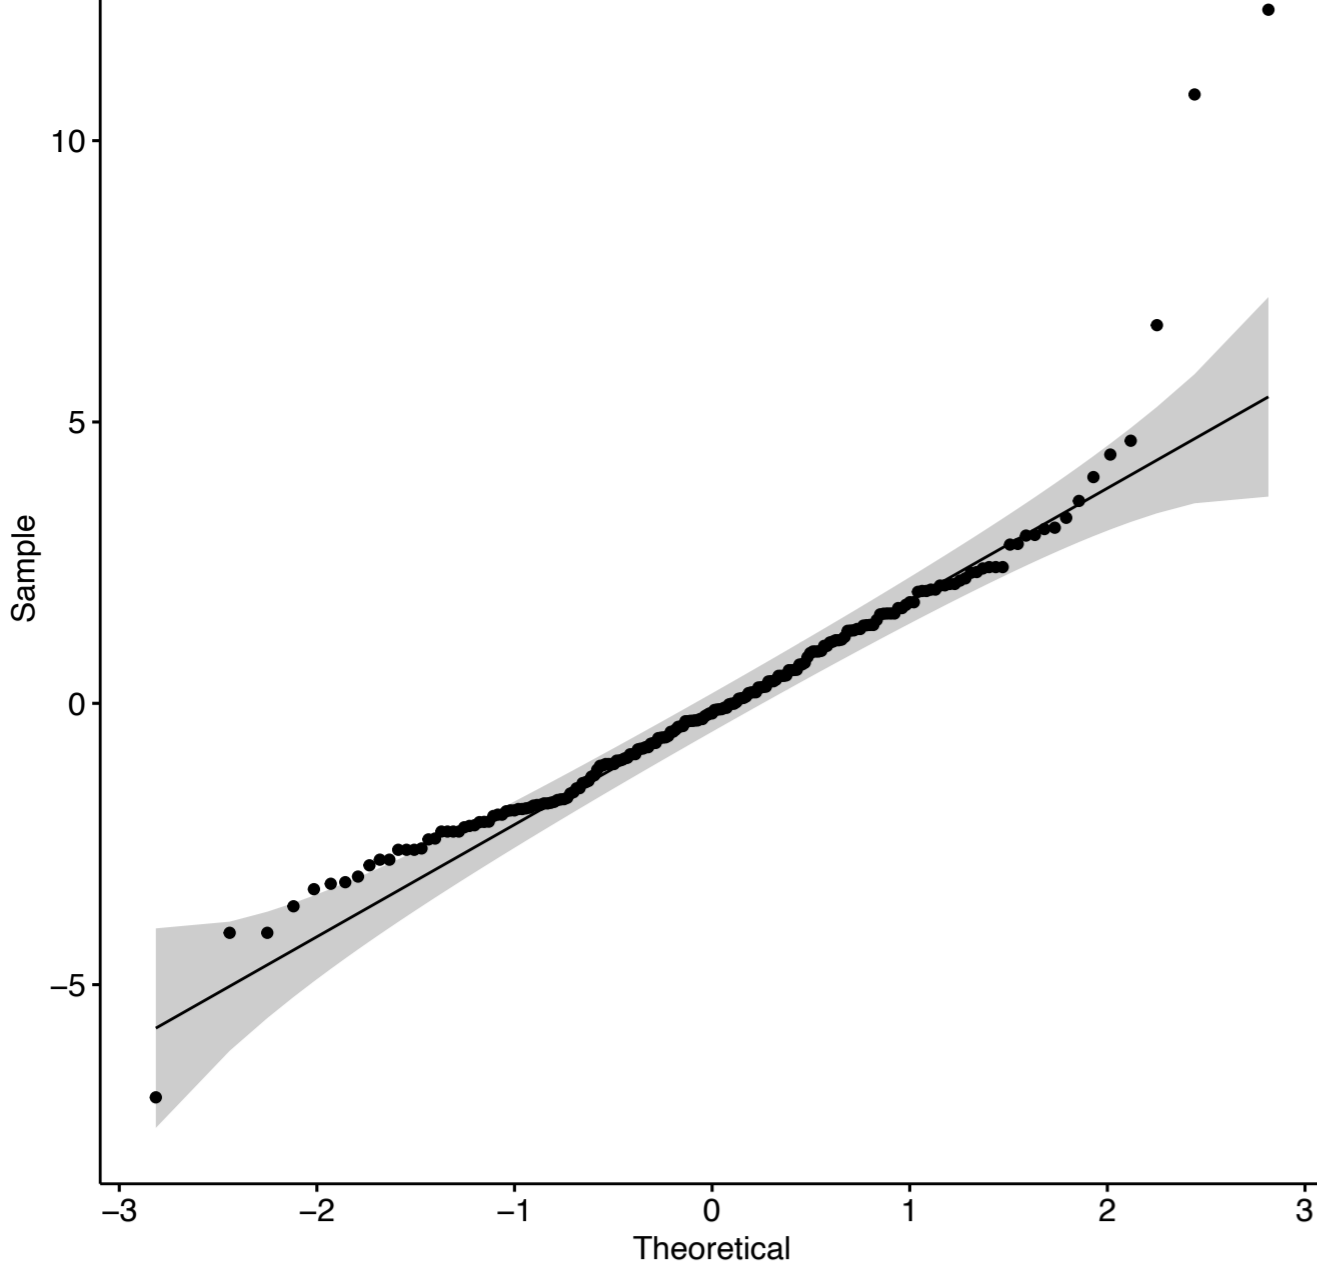

Femur

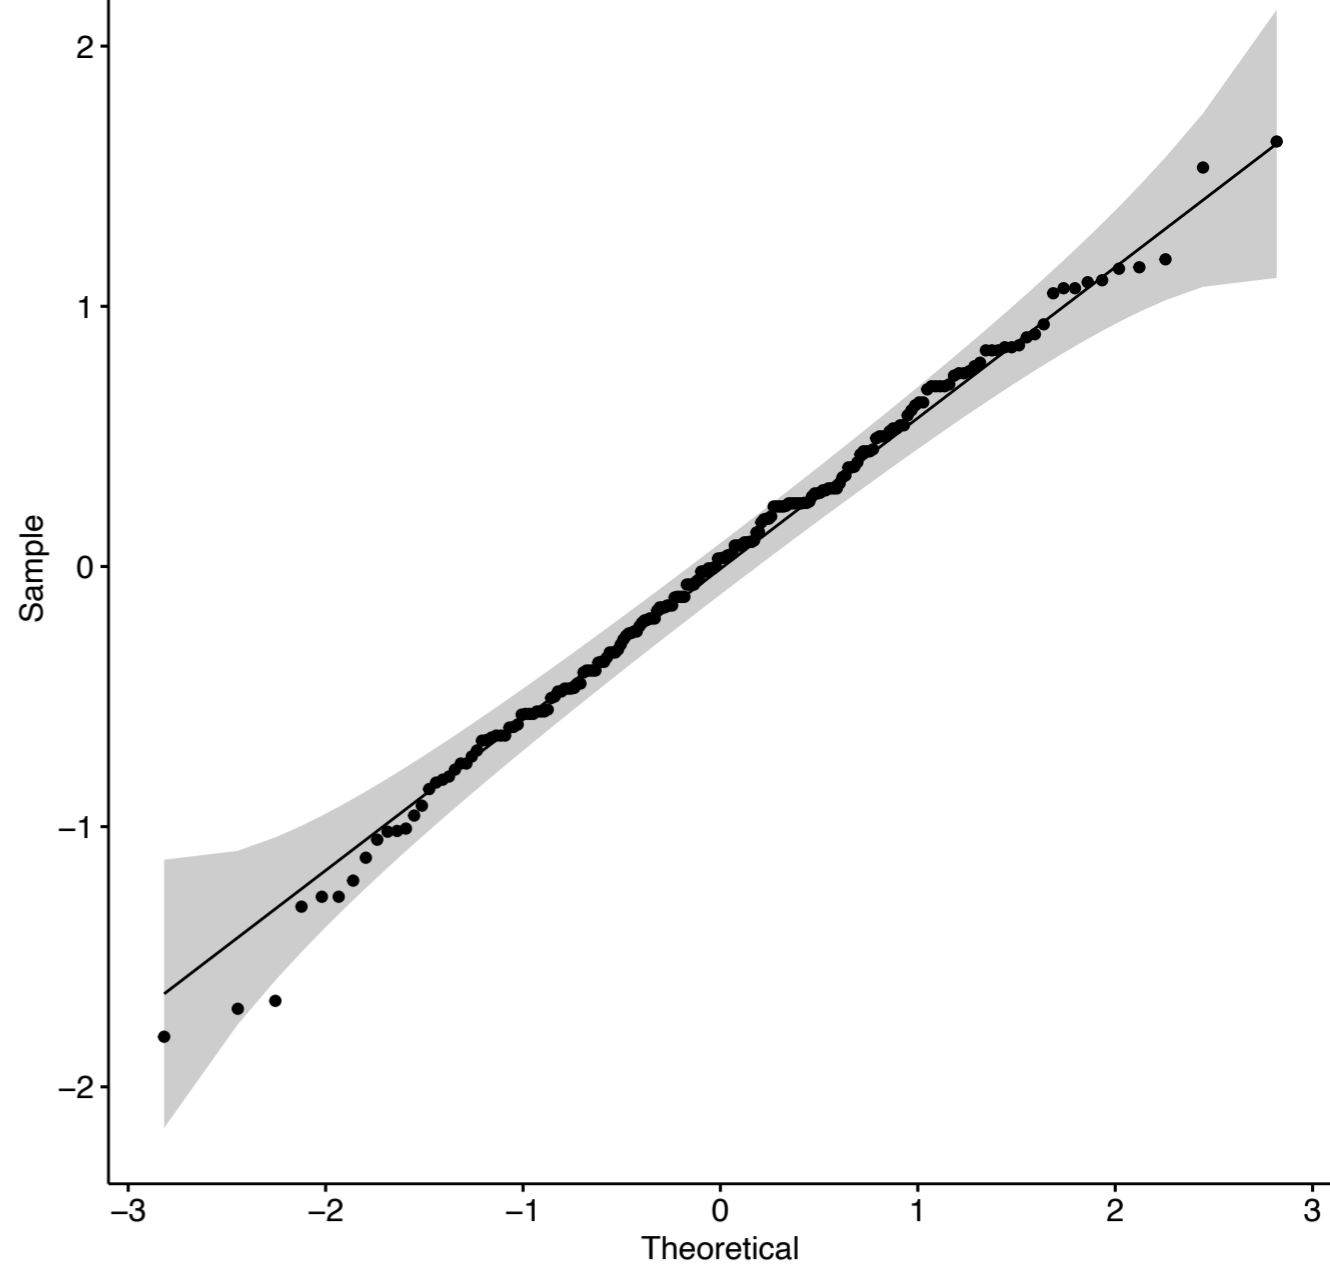

Forearm

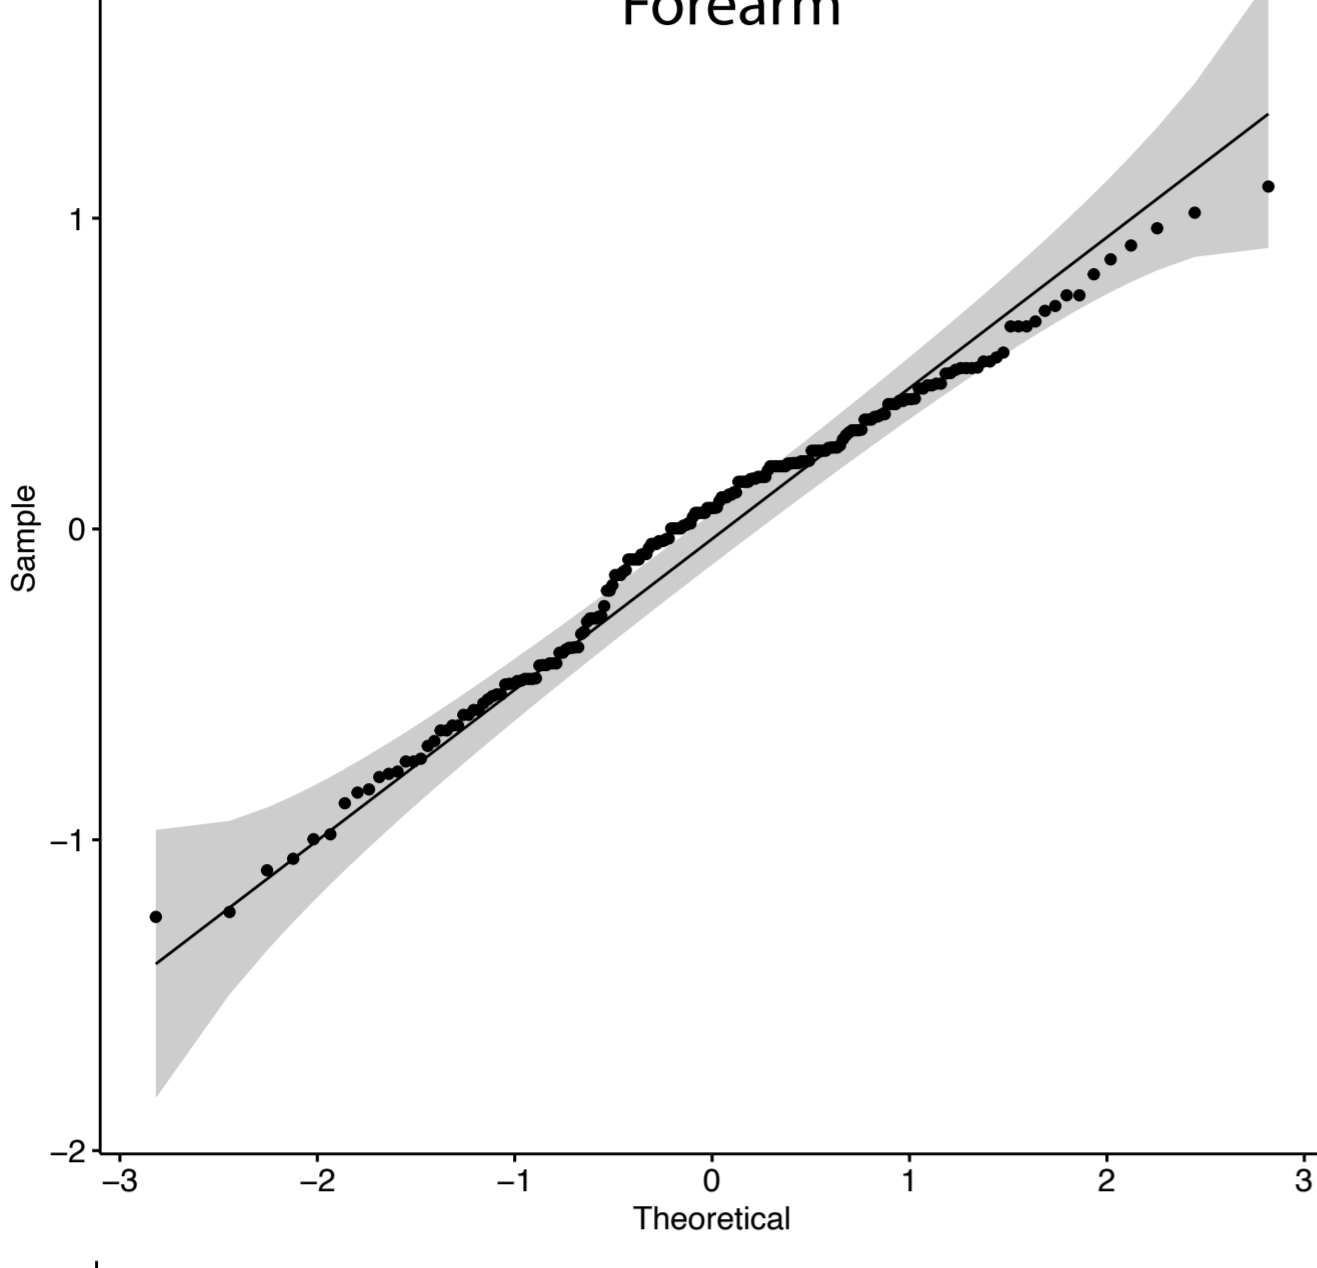

Foot

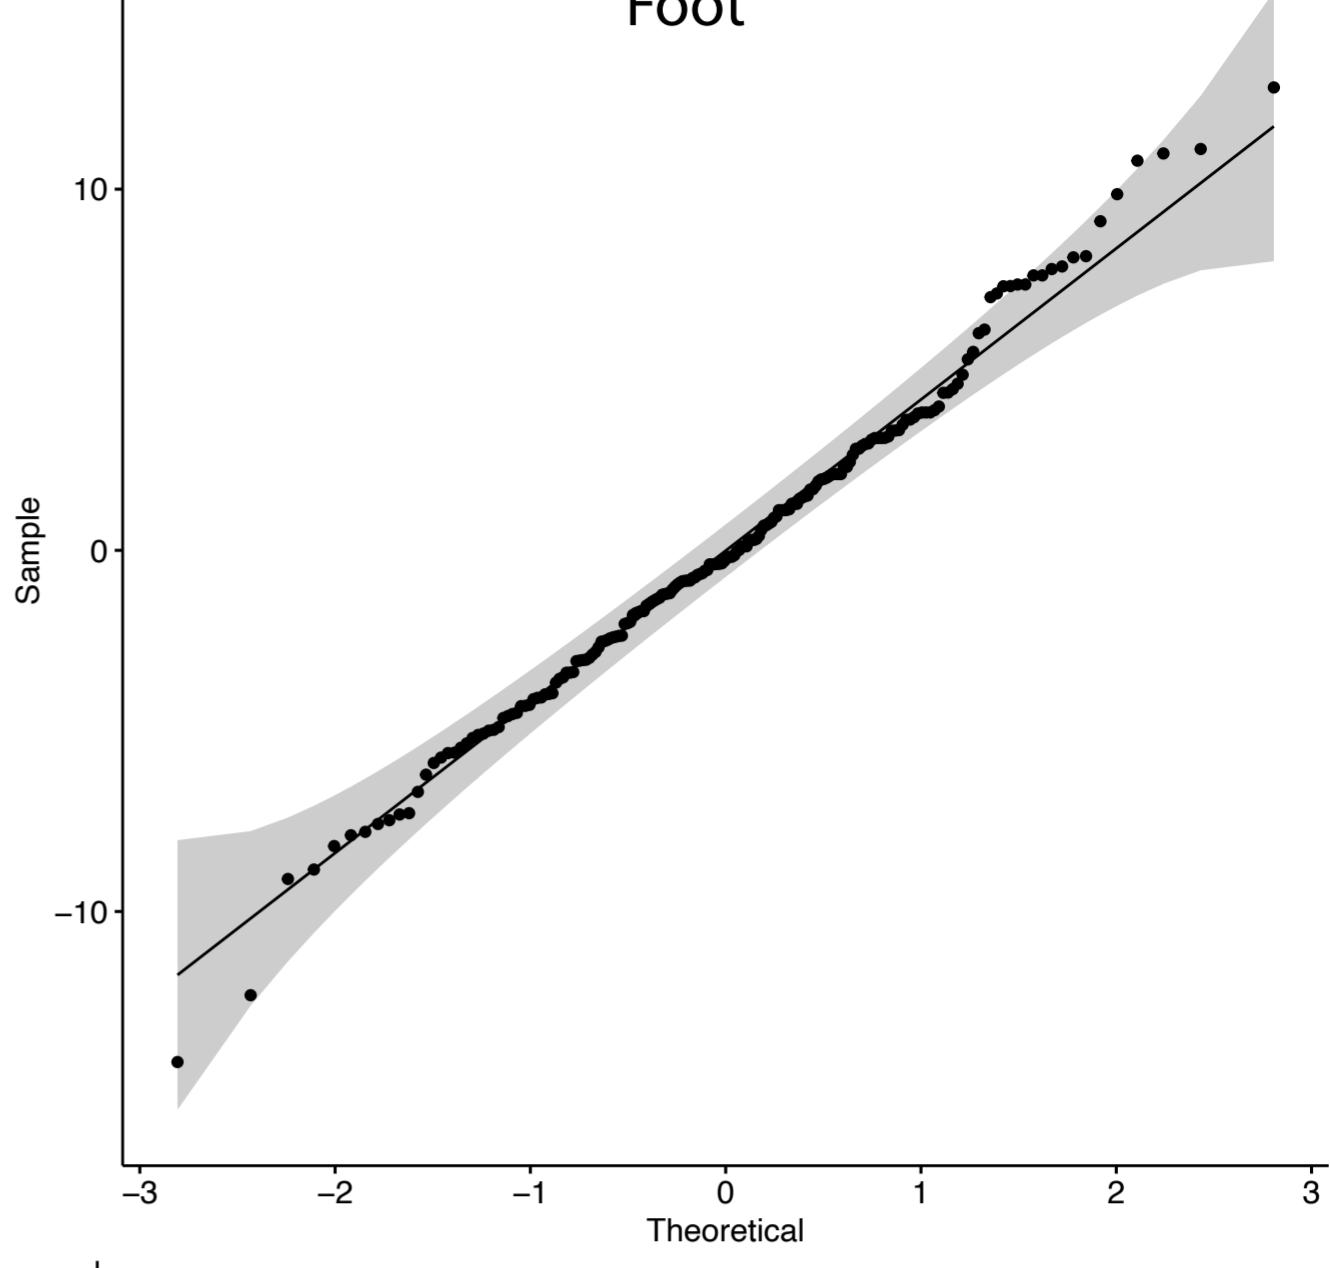

FO

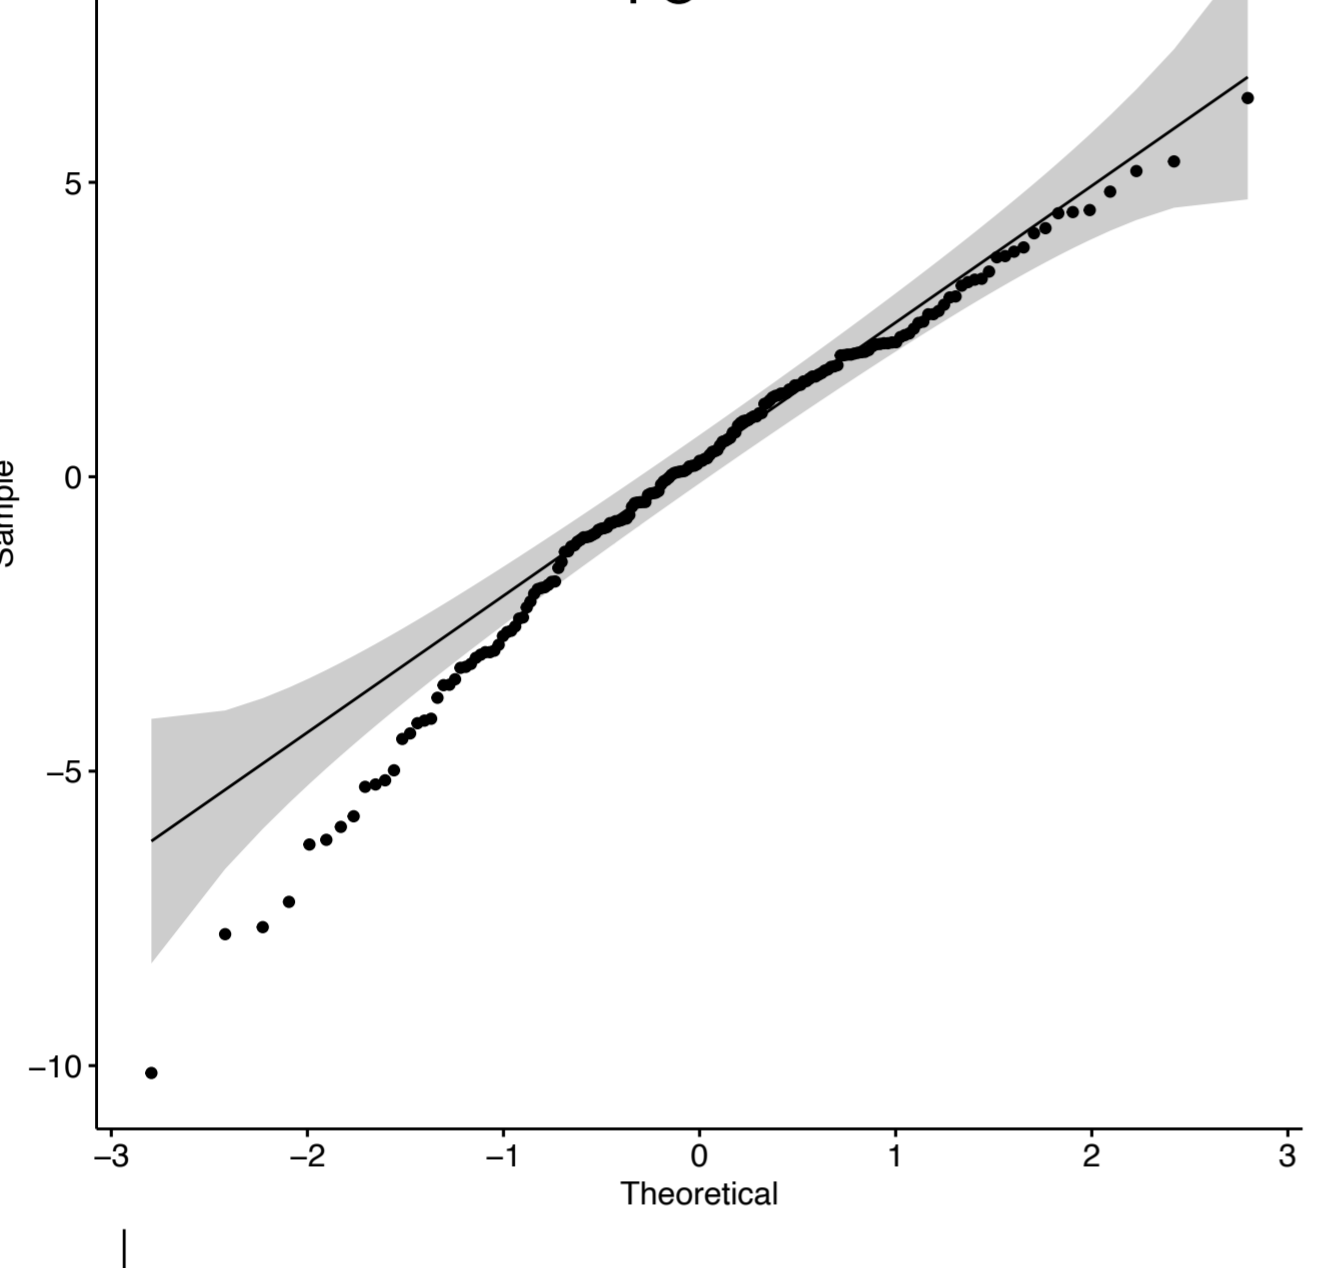

Hand

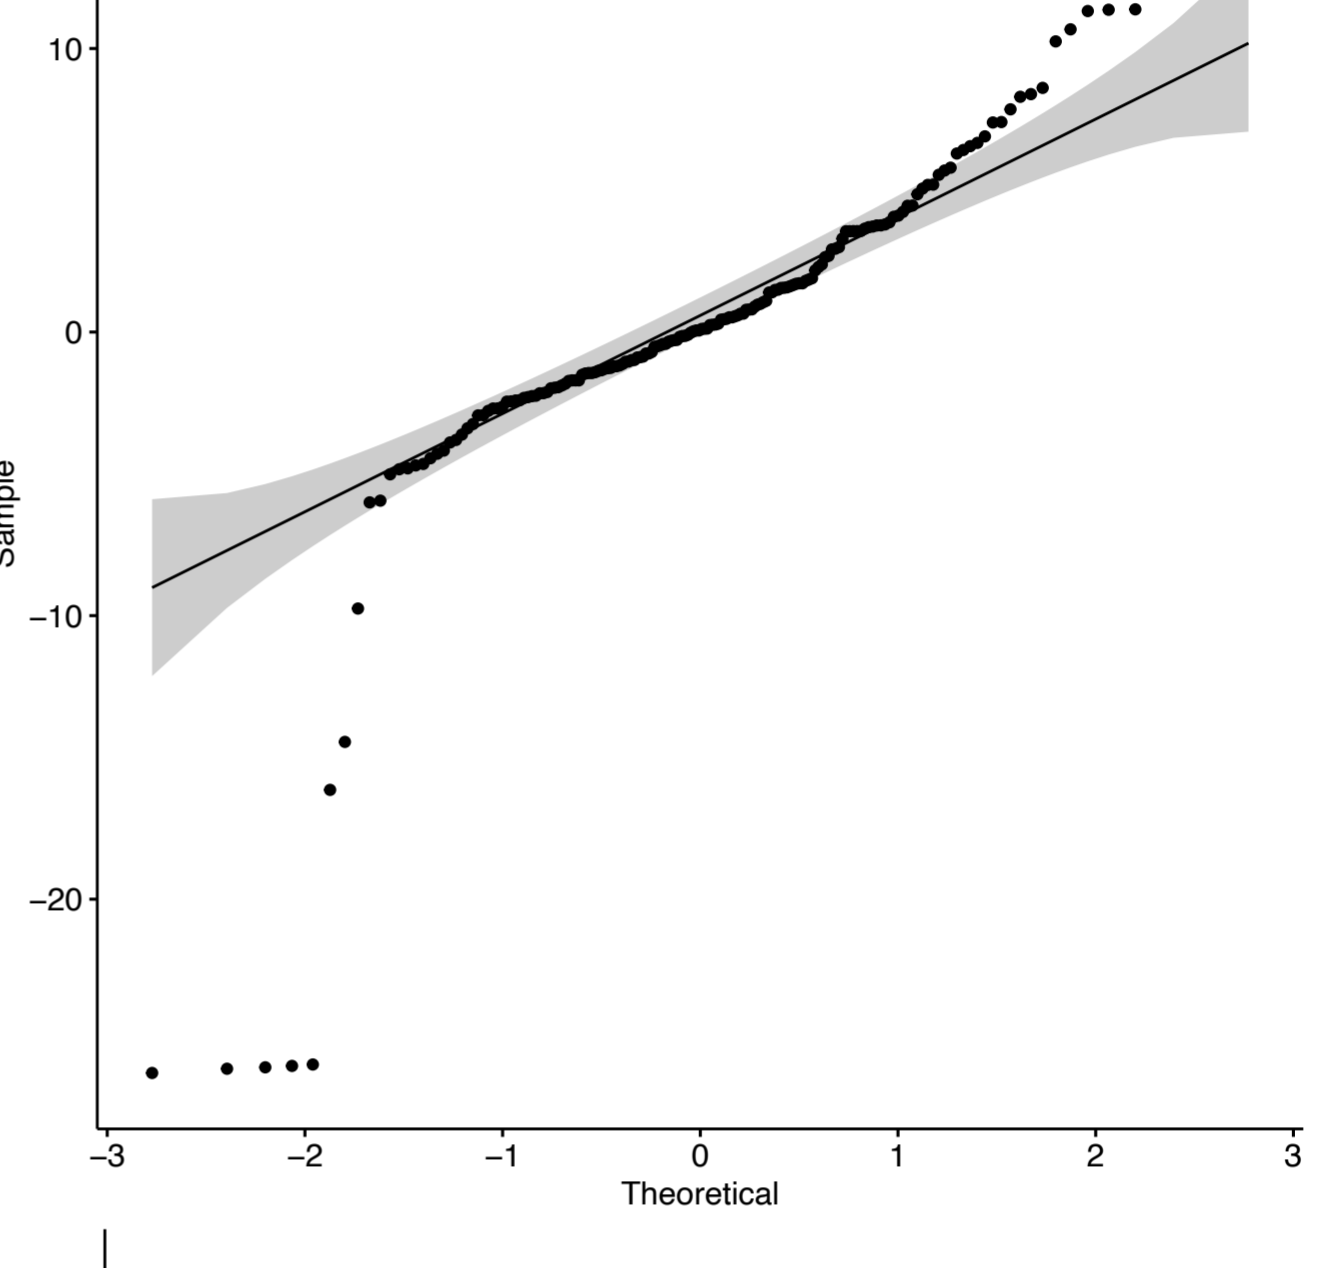

Humerus

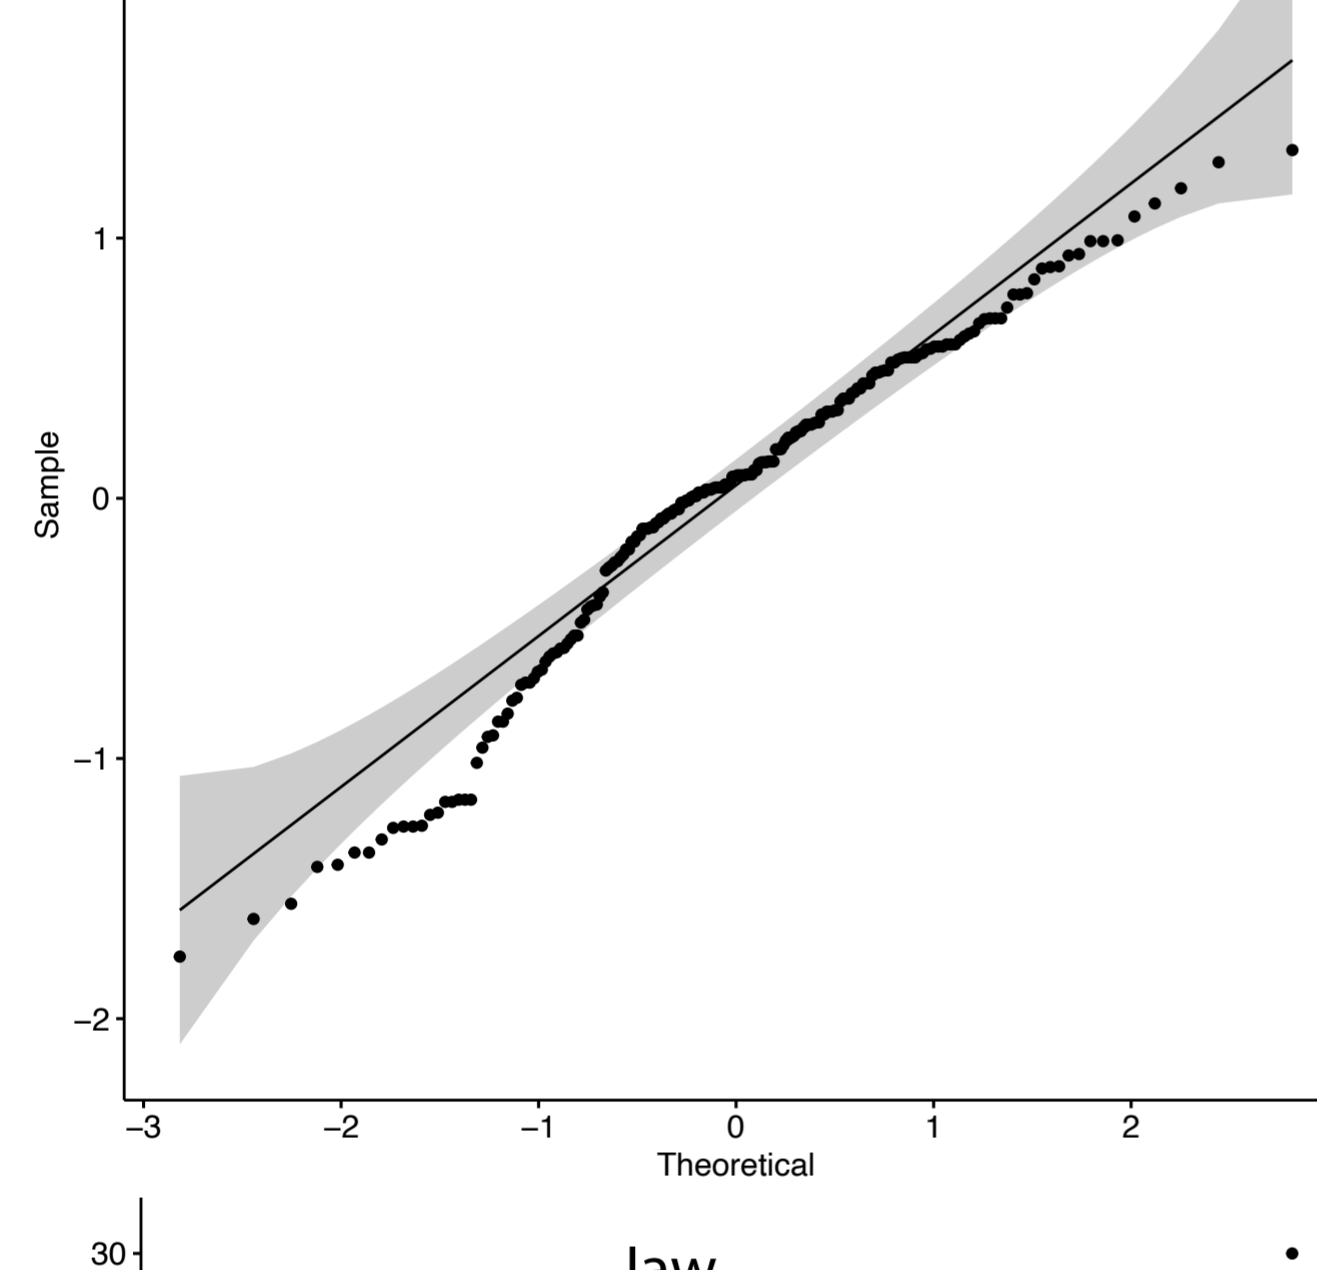

IC

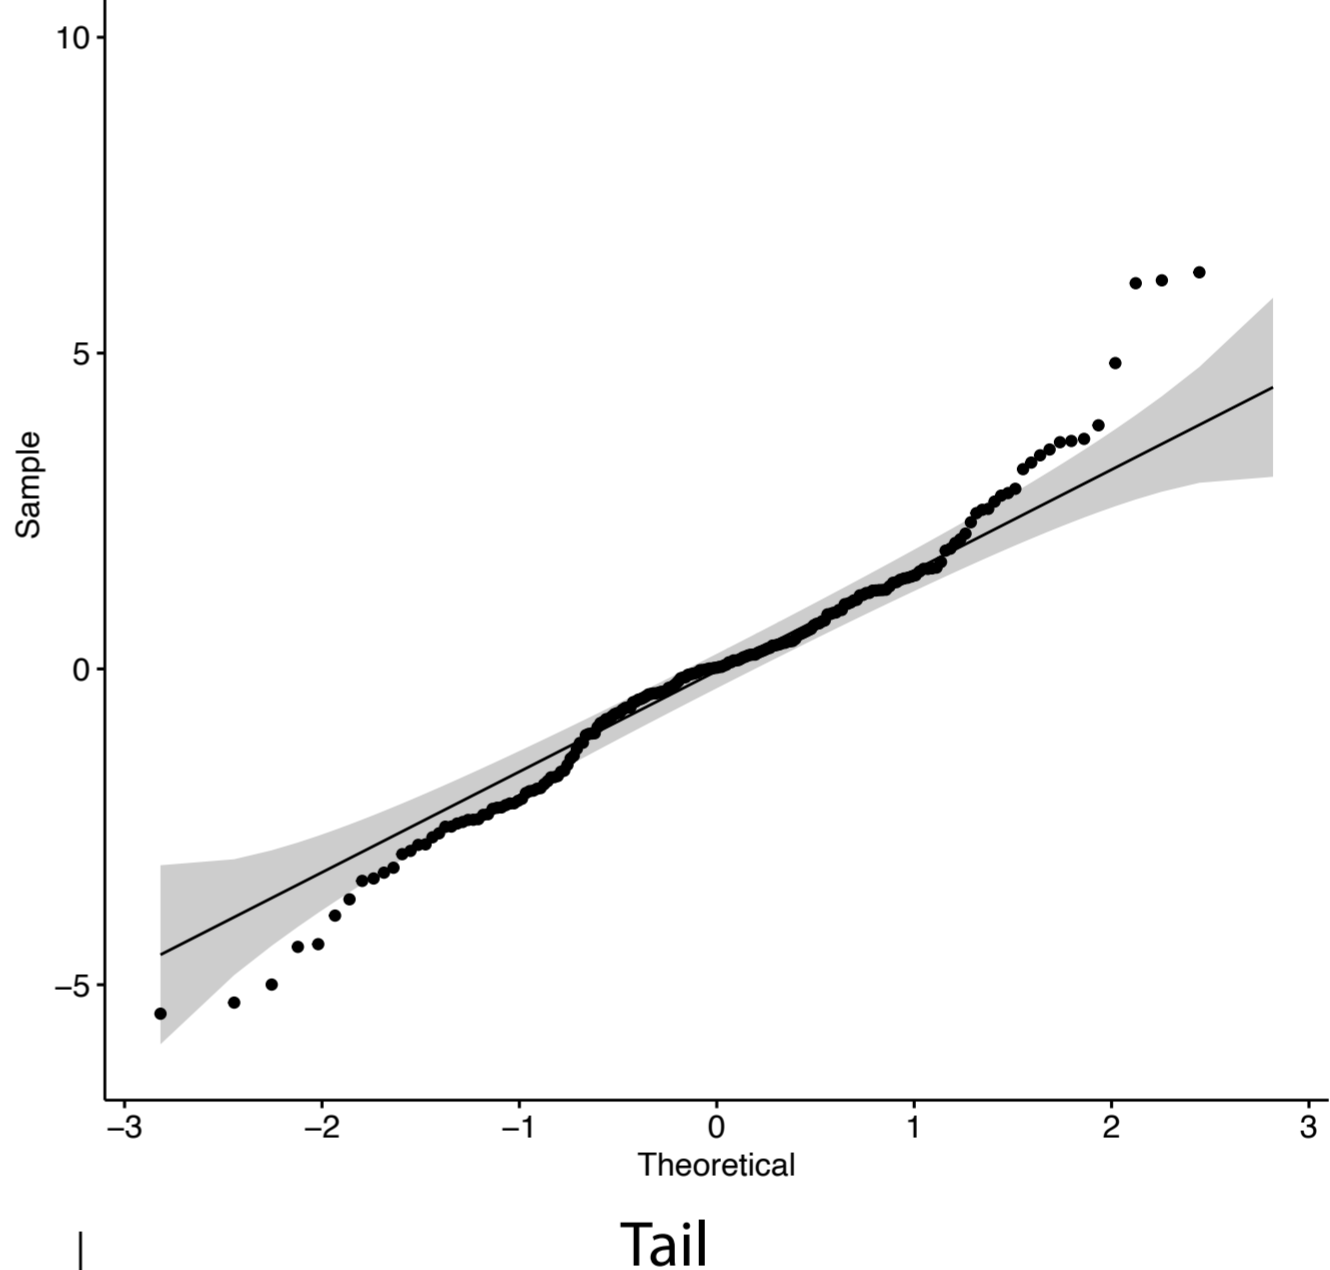

Jaw

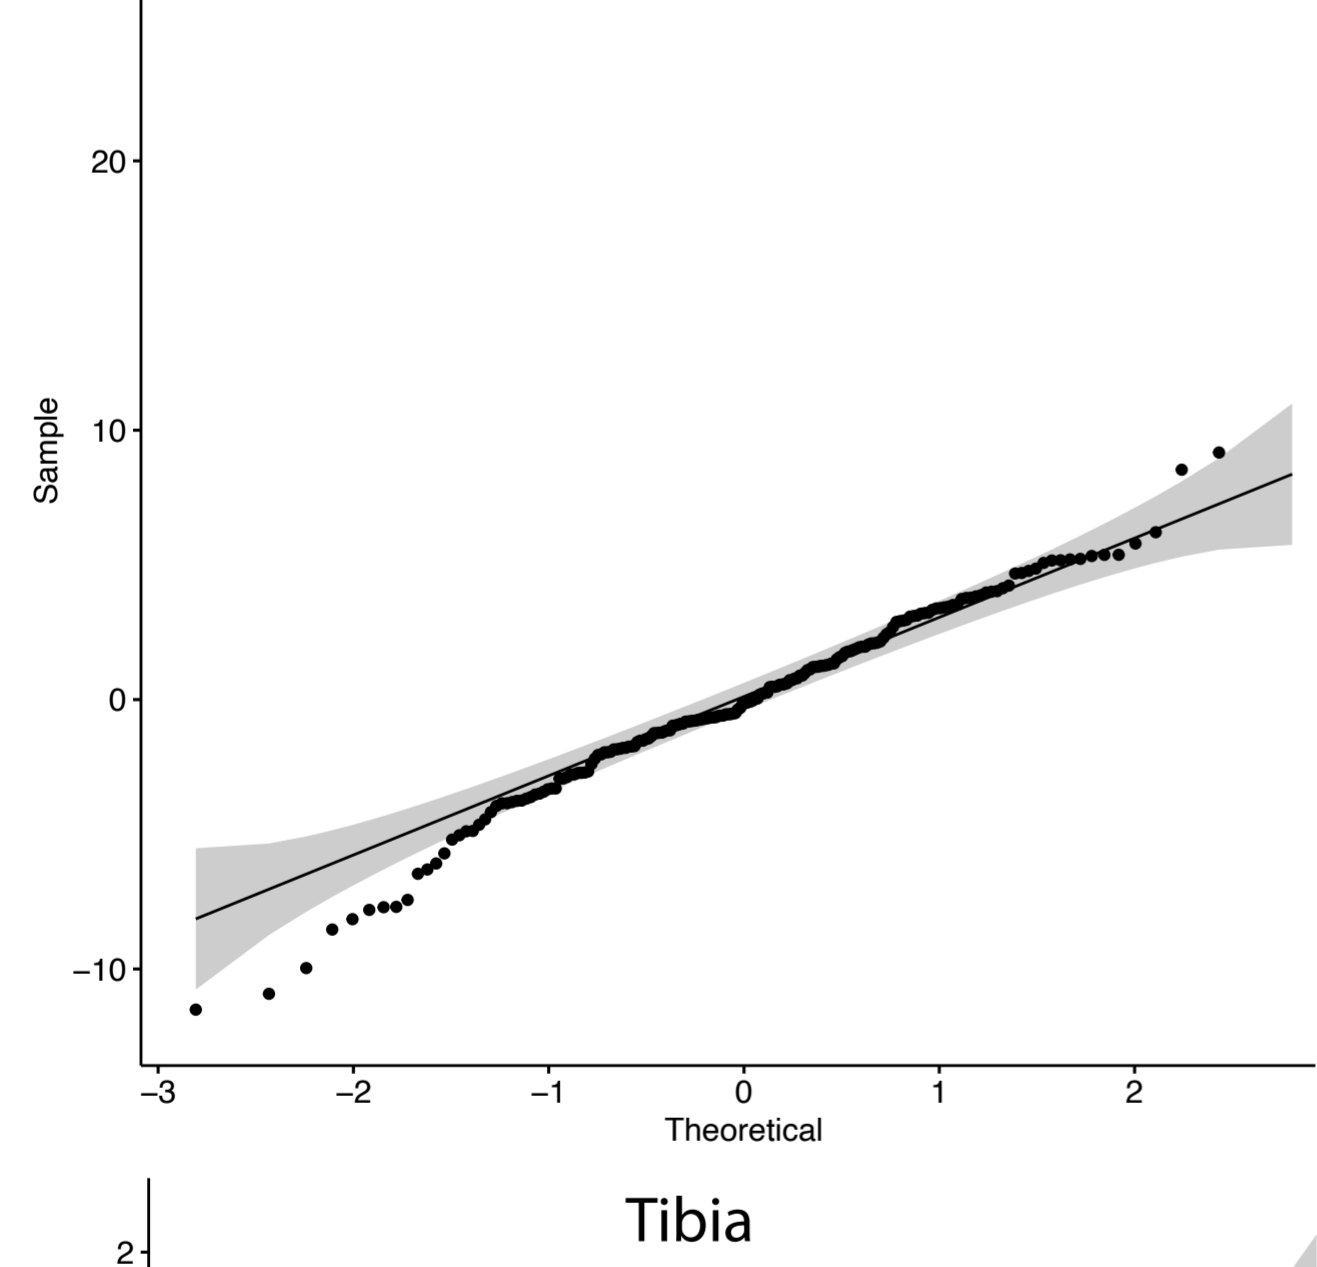

Tail

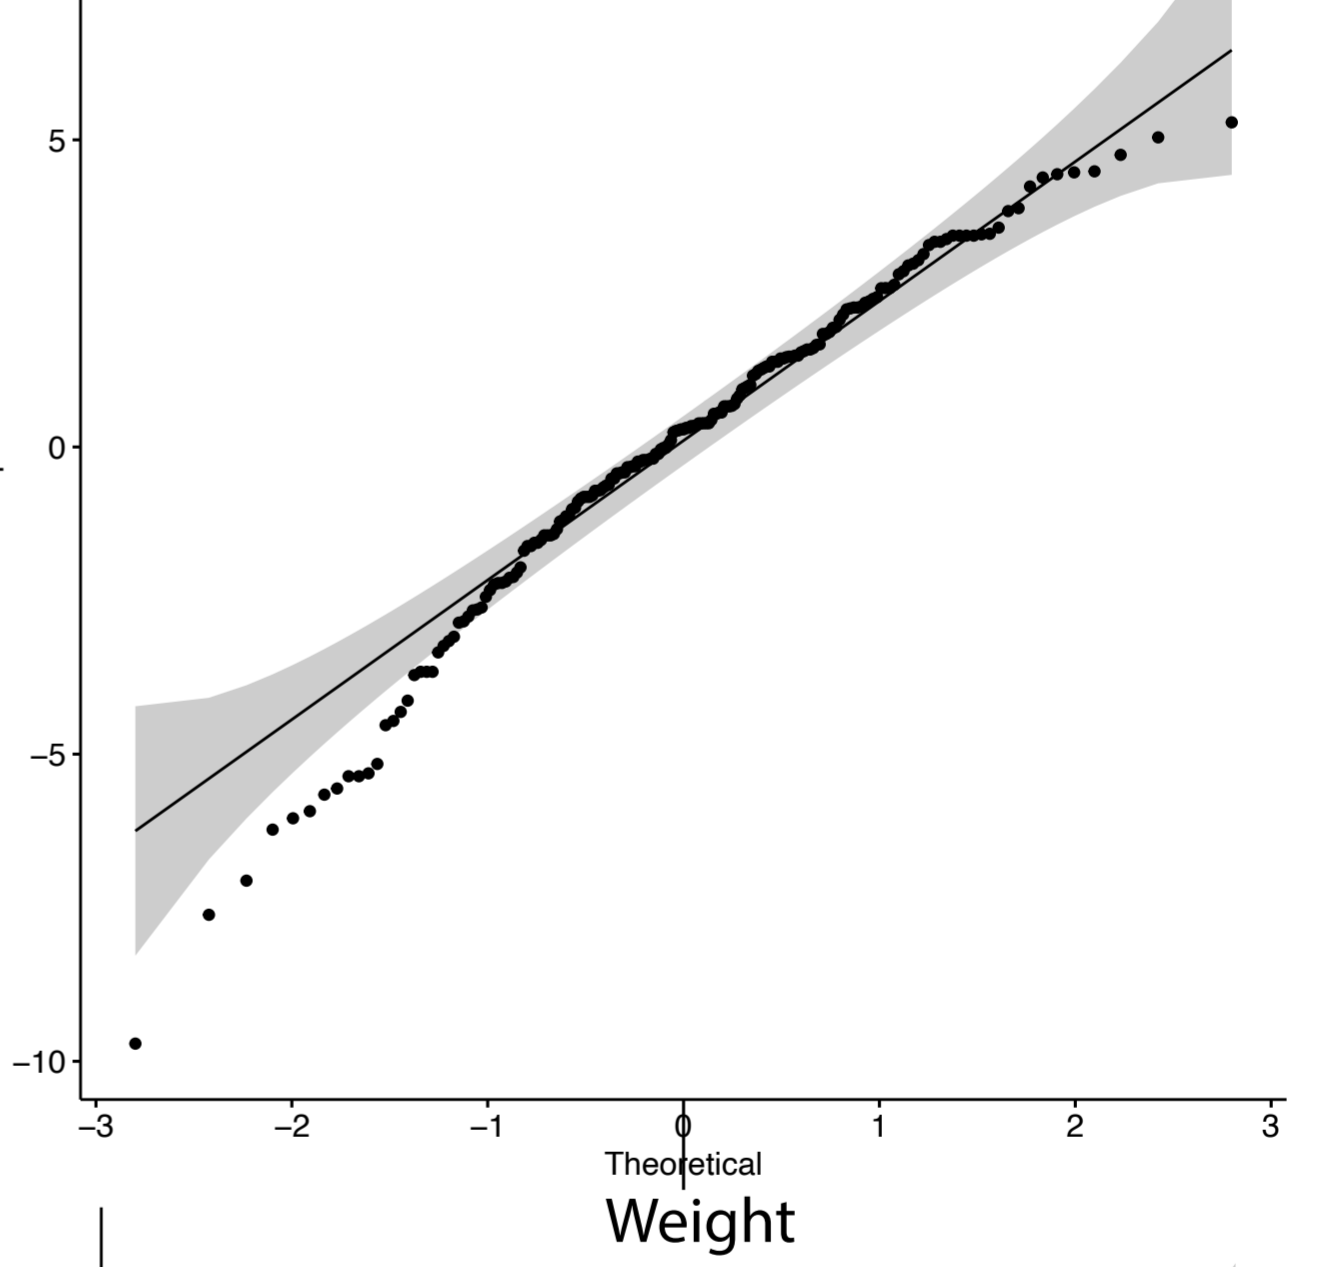

Tibia

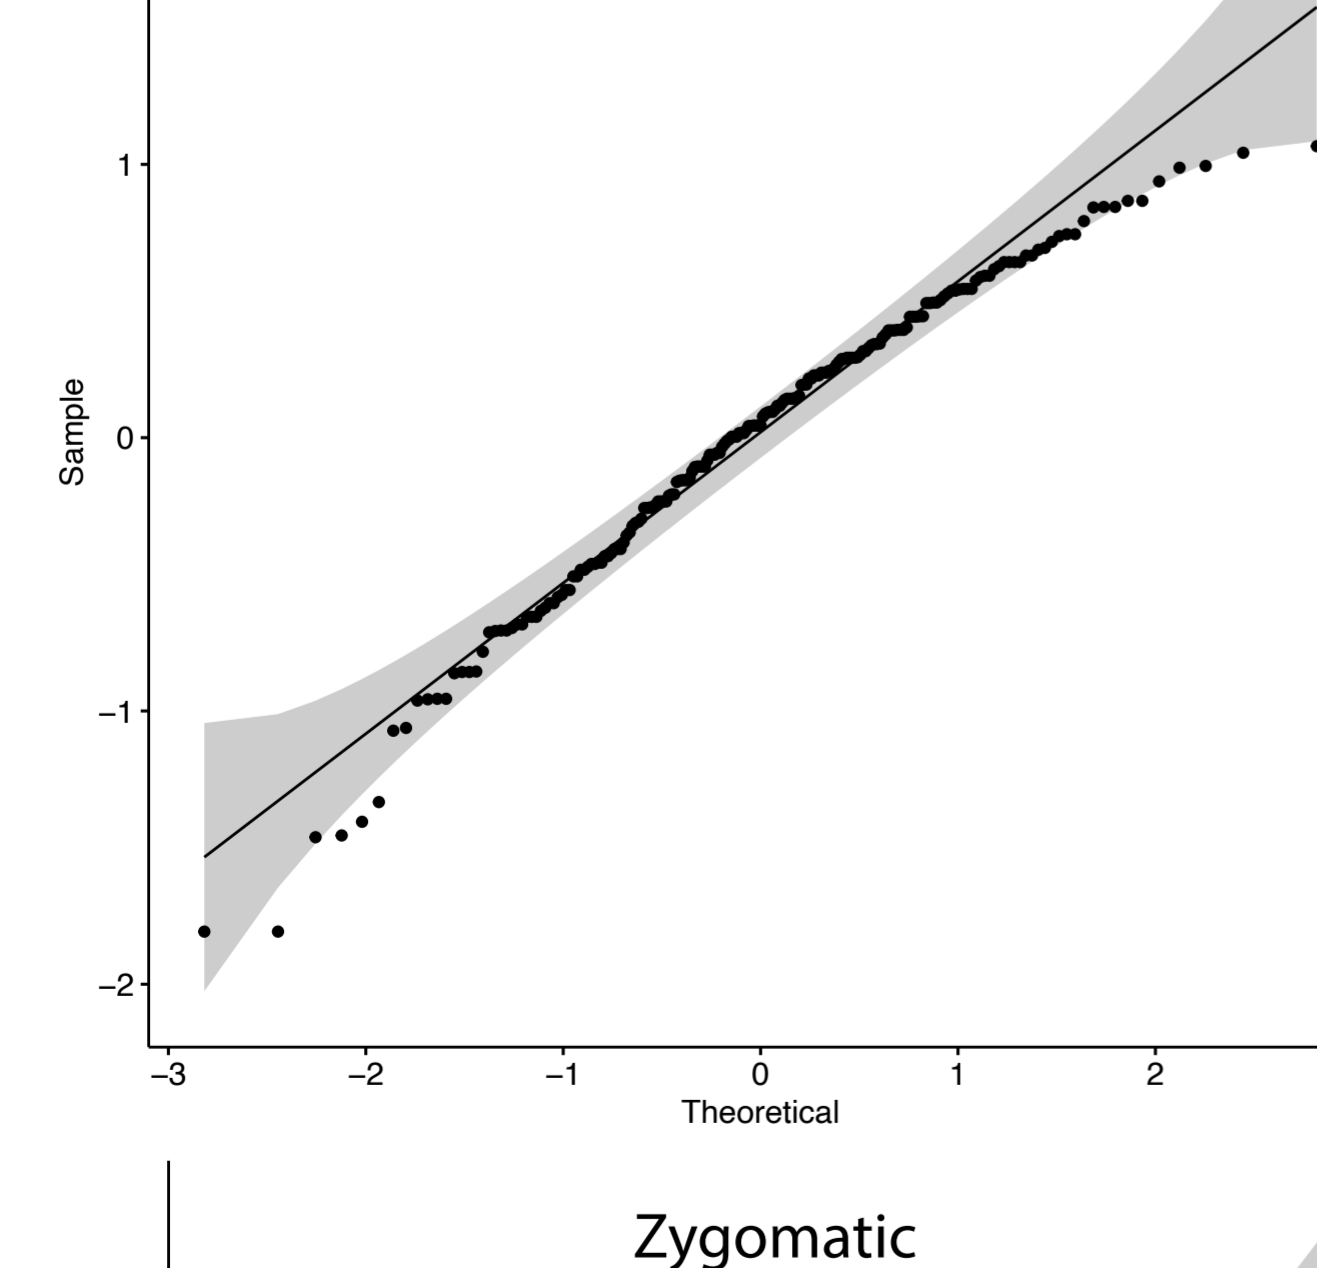

Weight

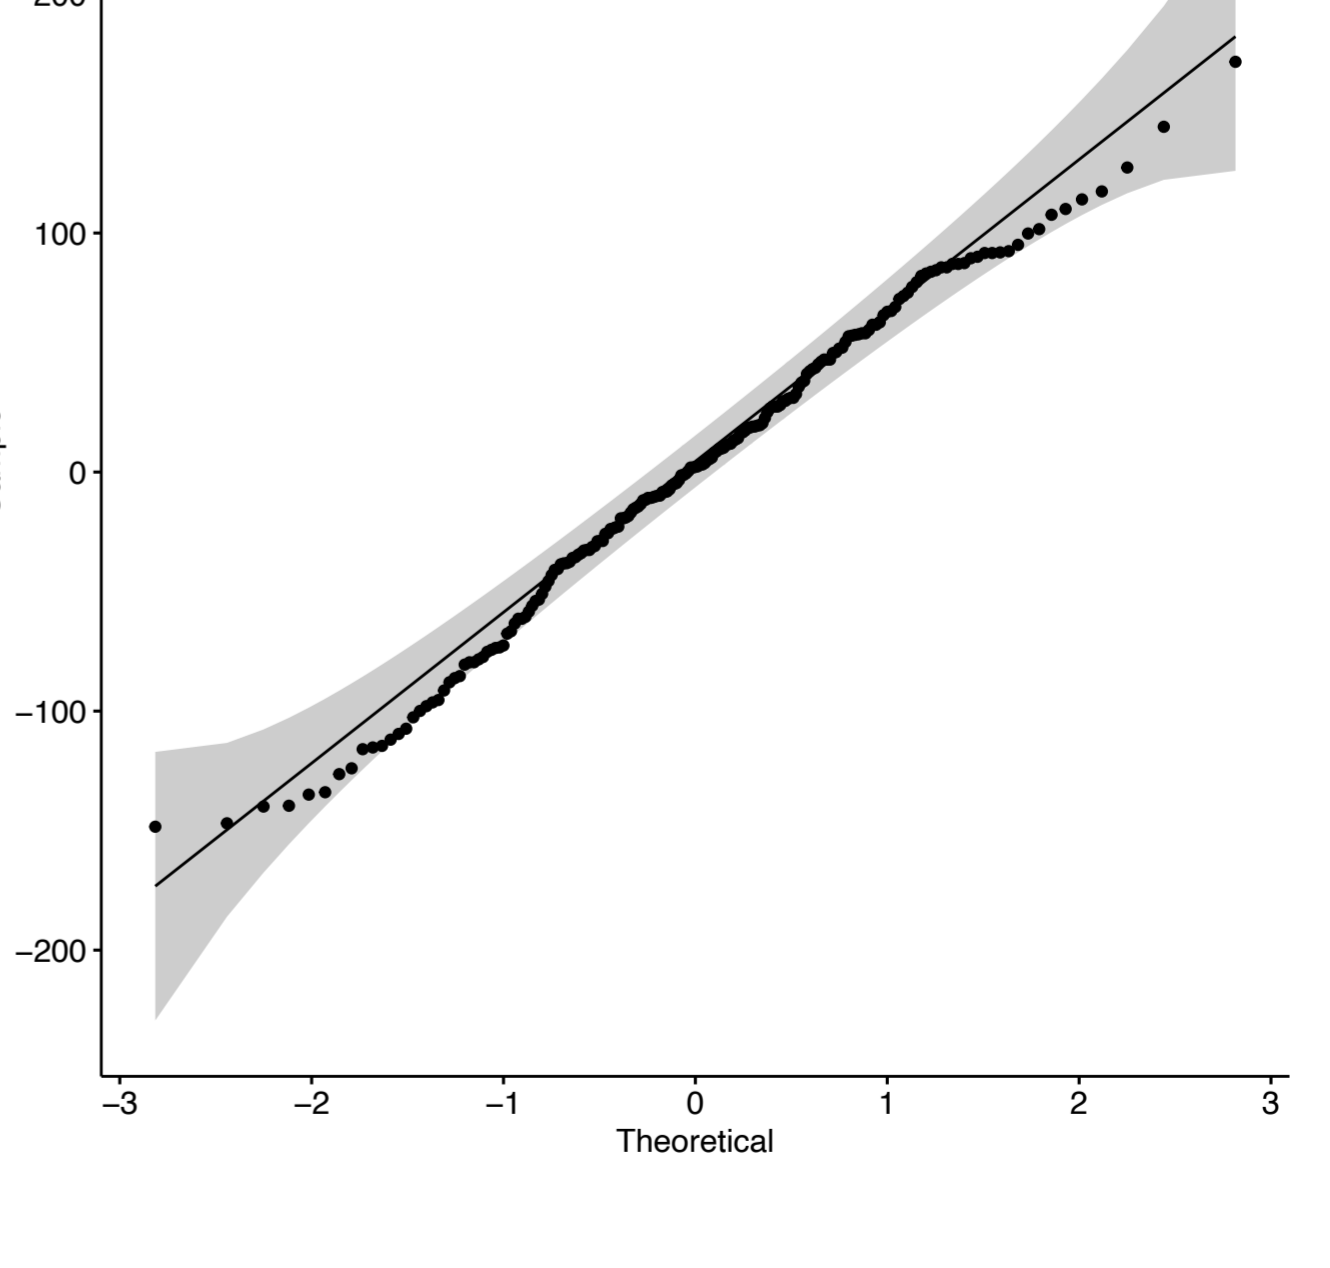

Zygomatic

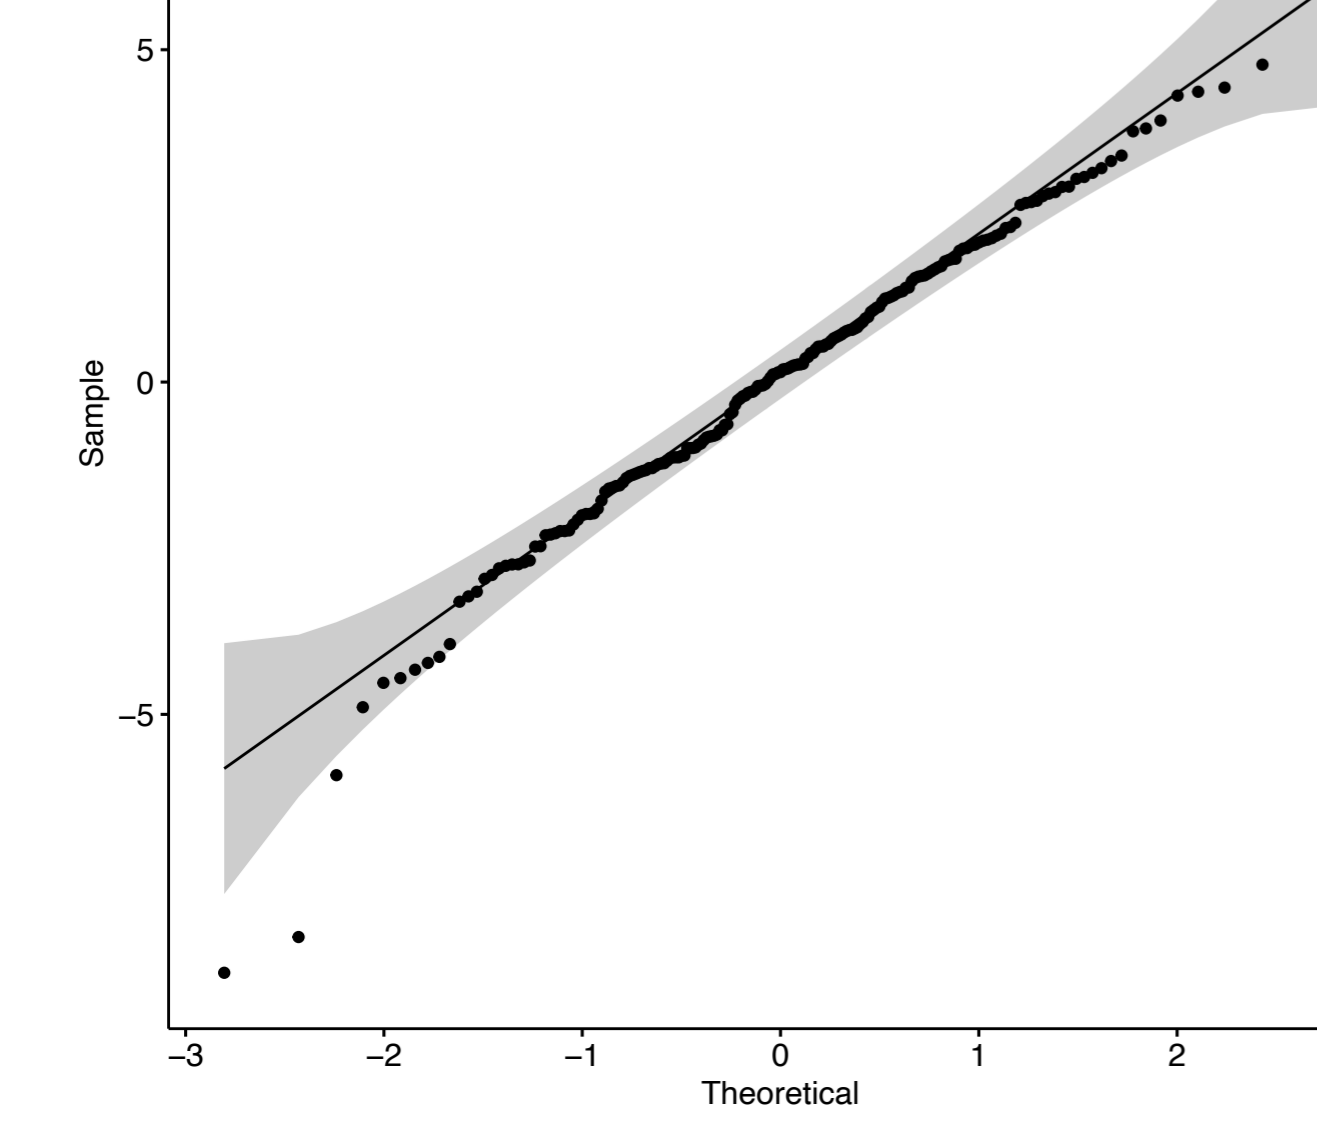

Supplement: 12862_2024_2305_MOESM2_ESM.pdf [file 12862_2024_2305_MOESM2_ESM.pdf]
